# Supplementary material for: Oxidative and/or Inflammatory Thrust Induced by Silver Nanoparticles in Rabbits: Effect of Vitamin E or NSAID Administration on Semen Parameters
Source: Mediators Inflamm. 2020 Dec 26;2020:6664062. doi: 10.1155/2020/6664062 (PMC7781726; doi:10.1155/2020/6664062)
Supplement: Supplementary Materials — Table S1: effects of LPS and AgNPs. Values are estimated marginal means and standard error of mean. Table S2: effects of NSAID and Vit E on AgNP-induced inflammation. Values are estimated marginal means and standard error of mean. [file 6664062.f1.docx]

**Supplementary materials**

**Table S1.** Effects of LPS and AgNPs. Values are Estimated marginal means and Standard Error of Mean

|  | **Group** | | | **P value** | | |
| --- | --- | --- | --- | --- | --- | --- |
| **Control** | **AgNPs** | **LPS** |
| **TRT** | **Time** | **Interaction** |
| **Volume (µL)** | 567.77a±14.99 | 471.58a±12.53 | 464.61a±18.81 | 0.083 | <0.001 | 0.006 |
| **Sperm concentration (106/mL)** | 368.61a±9.92 | 292.95b±14.82 | 301.72b±19.05 | 0.028 | <0.001 | 0.003 |
| **Static (%)** | 0.24b±0.01 | 0.41a±0.02 | 0.38a±0.01 | <0.001 | <0.001 | <0.001 |
| **Motility (%)** | 0.76a±0.01 | 0.59b±0.02 | 0.62b±0.01 | <0.001 | <0.001 | <0.001 |
| **VCL (μm/s)** | 295.94a±3.41 | 184.68c±4.98 | 224.39b±4.91 | <0.001 | <0.001 | 0.005 |
| **MDA SP (nmol /mL)** | 0.89c±0.08 | 2.94a±0.37 | 2.12b±0.28 | <0.001 | <0.001 | <0.001 |
| **MDA sperm (pmol /108 cells)** | 5.02c±0.30 | 9.85a±0.59 | 6.23b±0.37 | <0.001 | <0.001 | <0.001 |
| **MDA blood (nmol /mL)** | 0.47b±0.02 | 0.75a±0.06 | 0.78a±0.05 | <0.001 | <0.001 | <0.001 |
| **GPX blood (U/106 cells)** | 155.80a±12.37 | 62.46b±5.40 | 68.09b±6.09 | <0.001 | <0.001 | <0.001 |
| **GPX sperm (U/106 cells)** | 0.99a±0.04 | 0.44b±0.03 | 0.49b±0.05 | <0.001 | <0.001 | <0.001 |
| **CAT sperm (U/106 cells)** | 115.19a±4.66 | 63.65c±6.27 | 77.08b±6.24 | <0.001 | <0.001 | <0.001 |
| **CAT blood (U/106 cells)** | 225.36a±8.45 | 121.36c±10.80 | 149.62b±10.02 | <0.001 | <0.001 | <0.001 |
| **NO SP (µM)** | 66.10a±2.31 | 90.70a±3.96 | 94.05b±4.54 | <0.001 | <0.001 | <0.001 |
| **NO sperm (nmol/106 cells)** | 2.63c±0.08 | 4.81a±0.29 | 4.23b±0.18 | <0.001 | <0.001 | <0.001 |
| **IL-6 (pg/mL)** | 0.31b±0.01 | 0.51a±0.05 | 0.50a±0.04 | <0.001 | <0.001 | <0.001 |
| **IL-8 (pg/ mL)** | 2.28b±0.02 | 2.79a±0.20 | 2.65a±0.16 | <0.001 | <0.001 | <0.001 |
| **TNF-α (pg/ mL)*** | 0.03c±0.00 | 0.05b±0.00 | 0.13a±0.00 | <0.001 | <0.001 | <0.001 |
| **IL-1β (pg/ mL)** | 27.34c±0.36 | 38.21a±0.84 | 34.09b±0.74 | <0.001 | <0.001 | <0.001 |

*back transformed values.

Values in the same row not sharing the same subscript are significantly different at P < 0.05 (Sidak correction).

**Table S2.** Effects of NSAID and vit E on AgNPs -induced inflammation. Values are Estimated marginal means and Standard Error of Mean

|  | **Group** | | | **P value** | | |
| --- | --- | --- | --- | --- | --- | --- |
| **AgNPs** | **AgNPs + NSAID** | **AgNPs + Vit E** |
| **TRT** | **Time** | **Interaction** |
| **Volume (µL)** | 472.14b±12.46 | 617.15a±27.84 | 499.76b±10.73 | 0.005 | 0.002 | <0.001 |
| **Sperm cell (106/mL)** | 292.95a±14.82 | 224.15b±8.79 | 259.77ab±7.95 | 0.018 | 0.002 | 0.008 |
| **Static (%)** | 0.41a±0.02 | 0.32c±0.01 | 0.36b±0.01 | <0.001 | <0.001 | <0.001 |
| **Motility (%)** | 0.59c±0.02 | 0.68a±0.01 | 0.64b±0.01 | <0.001 | <0.001 | <0.001 |
| **VCL (μm/s)** | 184.68c±4.98 | 280.18a±7.34 | 253.24b±7.43 | <0.001 | <0.001 | <0.001 |
| **MDA SP (nmol /mL)** | 2.94a±0.37 | 1.46b±.17 | 2.92a±0.21 | <0.001 | <0.001 | <0.001 |
| **MDA sperm (pmol /108 cells)** | 9.86a±0.59 | 9.43a±0.59 | 9.58a±0.47 | 0.722 | <0.001 | <0.001 |
| **MDA blood (nmol /mL)** | 0.75a±0.06 | 0.53b±0.01 | 0.68a±0.03 | <0.001 | <0.001 | <0.001 |
| **GPX blood (U/106 cells)** | 62.44c±5.40 | 146.75a±14.52 | 82.55b±7.07 | <0.001 | <0.001 | <0.001 |
| **GPX sperm (U/106 cells)** | 0.44b±0.03 | 0.87a±0.04 | 0.48b±0.02 | <0.001 | <0.001 | <0.001 |
| **CAT sperm (U/106 cells)** | 63.65c±6.27 | 100.06a±5.58 | 82.93b±4.11 | <0.001 | <0.001 | <0.001 |
| **CAT blood (U/106 cells)** | 121.03c±10.82 | 199.88a±11.22 | 165.95b±8.22 | <0.001 | <0.001 | <0.001 |
| **NO SP (µM)** | 90.69b±3.96 | 103.95a±3.74 | 99.31a±3.38 | <0.001 | <0.001 | <0.001 |
| **NO sperm (nmol 106 cells)** | 4.81a±0.29 | 3.52b±0.25 | 4.50a±0.25 | <0.001 | <0.001 | <0.001 |
| **IL-6 (pg/mL)** | 0.51b±0.05 | 0.43b±0.02 | 0.65a±0.05 | <0.001 | <0.001 | <0.001 |
| **IL-8 (pg/ mL)** | 2.79a±0.20 | 2.72a±0.04 | 2.70a±0.14 | 0.803 | <0.001 | <0.001 |
| **TNF-α (pg/ mL)*** | 0.05b±0.00 | 0.02a±0.00 | 0.07b±0.00 | <0.001 | <0.001 | <0.001 |
| **IL-1β (pg/ mL)** | 38.21a±0.84 | 28.92c±0.95 | 35.18b±0.85 | <0.001 | <0.001 | <0.001 |

*back transformed values.

Values in the same row not sharing the same subscript are significantly different at P < 0.05 (Sidak correction).
